# Supplementary material
Source: ML conference proceedings conference paper supplement (https://openaccess.thecvf.com/content/CVPR2023/html/Jiang_AligNeRF_High-Fidelity_Neural_CVPR_2023_paper.html)
Supplement: Supplementary file 1 [file Jiang_AligNeRF_High-Fidelity_Neural_CVPR_2023_supplemental.pdf]

# Supplementary Materials of “AligNeRF: High-Fidelity Neural Radiance Fields via Alignment-Aware Training”

Anonymous CVPR submission

Paper ID 7058

## 1. Effectiveness of Alignment-aware Training

To further understand how much the alignment-aware training improves NeRF’s performance, we quantitatively analyze the performance of NeRF models trained with different training strategy. Concretely speaking, we set 9 models and each model are optimized with the same training iterations. However, instead of adopting alignment-aware training in the entire fine-tuning stage, we only include it in a sub-stage and keep the standard training for the rest time. The percentage of alignment-aware training iterations in the total training iterations range from 0.1 to 0.9, as shown in Fig. 1. By comparing three metrics, the experiments demonstrate that longer alignment-aware training strategy can consistently improve NeRF’s performance.

## 2. Detailed Experimental Results

To present detailed scores on each scene, we include the expanded version of the main results on comparing the proposed methods with the previous version, as shown in Table 1 and 2. Meanwhile, we include depth map visualization in the project pages: <https://yifanjiang19.github.io/alignerf>.

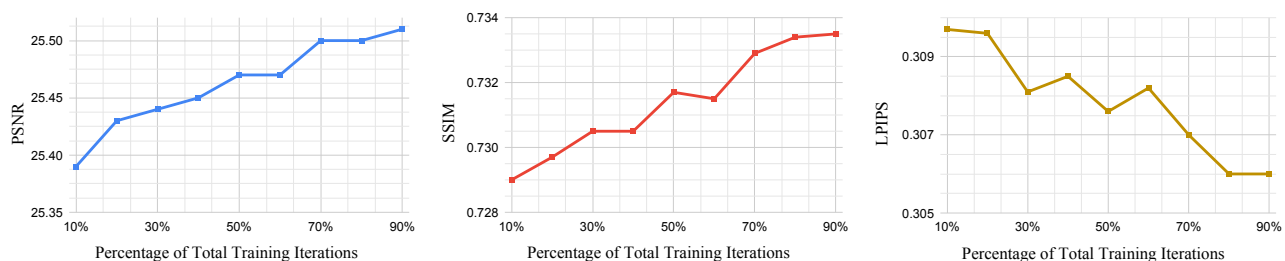

Figure 1. Analysis of the effectiveness made by alignment-aware training. We evaluate 9 models trained with different strategy. The percentage of total training iterations shows how much the alignment-aware training strategy takes comparing to the whole fine-tuning stage. Three metrics are reported and the results demonstrate that adopting more alignment-aware training can produce better NeRF models.

| PSNR                             |                |                |               |              |                 |
|----------------------------------|----------------|----------------|---------------|--------------|-----------------|
| Method                           | <i>bicycle</i> | <i>flowers</i> | <i>garden</i> | <i>stump</i> | <i>treehill</i> |
| NeRF [5]                         | 21.76          | 19.40          | 23.11         | 21.73        | 21.28           |
| mip-NeRF [1]                     | 21.69          | 19.31          | 23.16         | 23.10        | 21.21           |
| Deep Blending [3]                | 21.09          | 18.13          | 23.61         | 24.08        | 20.80           |
| Point-Based Neural Rendering [4] | 21.64          | 19.28          | 22.50         | 23.90        | 20.98           |
| Instant-NGP [6]                  | 22.78          | 19.18          | 25.25         | 24.79        | 22.45           |
| Stable View Synthesis [8]        | 22.79          | 20.15          | 25.99         | 24.39        | 21.72           |
| mip-NeRF [1] w/bigger MLP        | 22.90          | 20.79          | 25.85         | 23.64        | 21.71           |
| NeRF++ [9] w/bigger MLPs         | 23.75          | 21.11          | 25.91         | 25.48        | 22.77           |
| mip-NeRF-360 [2]                 | 24.46          | 21.45          | 26.94         | 26.40        | 22.53           |
| Ours                             | 24.75          | 21.61          | 27.07         | 26.69        | 22.63           |

  

| SSIM                             |                |                |               |              |                 |
|----------------------------------|----------------|----------------|---------------|--------------|-----------------|
| Method                           | <i>bicycle</i> | <i>flowers</i> | <i>garden</i> | <i>stump</i> | <i>treehill</i> |
| NeRF [5]                         | 0.455          | 0.376          | 0.546         | 0.453        | 0.459           |
| NeRF w/ DONeRF [7] param.        | 0.454          | 0.379          | 0.542         | 0.522        | 0.461           |
| mip-NeRF [1]                     | 0.454          | 0.373          | 0.543         | 0.517        | 0.46            |
| NeRF++ [9]                       | 0.526          | 0.453          | 0.635         | 0.594        | 0.530           |
| Deep Blending [3]                | 0.466          | 0.320          | 0.675         | 0.634        | 0.523           |
| Point-Based Neural Rendering [4] | 0.608          | 0.487          | 0.735         | 0.651        | 0.579           |
| Instant-NGP [6]                  | 0.540          | 0.378          | 0.709         | 0.654        | 0.546           |
| Stable View Synthesis [8]        | 0.663          | 0.541          | 0.818         | 0.683        | 0.606           |
| mip-NeRF [1] w/bigger MLP        | 0.612          | 0.514          | 0.777         | 0.643        | 0.577           |
| NeRF++ [9] w/bigger MLPs         | 0.630          | 0.533          | 0.761         | 0.687        | 0.597           |
| mip-NeRF-360 [2]                 | 0.690          | 0.572          | 0.815         | 0.747        | 0.621           |
| Ours                             | 0.7052         | 0.588          | 0.825         | 0.765        | 0.632           |

  

| LPIPS                            |                |                |               |              |                 |
|----------------------------------|----------------|----------------|---------------|--------------|-----------------|
| Method                           | <i>bicycle</i> | <i>flowers</i> | <i>garden</i> | <i>stump</i> | <i>treehill</i> |
| NeRF [5]                         | 0.536          | 0.529          | 0.415         | 0.551        | 0.546           |
| NeRF w/ DONeRF [7] param.        | 0.542          | 0.539          | 0.436         | 0.492        | 0.545           |
| mip-NeRF [1]                     | 0.541          | 0.535          | 0.422         | 0.490        | 0.538           |
| NeRF++ [9]                       | 0.455          | 0.466          | 0.331         | 0.416        | 0.466           |
| Deep Blending [3]                | 0.377          | 0.476          | 0.231         | 0.351        | 0.383           |
| Point-Based Neural Rendering [4] | 0.313          | 0.372          | 0.197         | 0.303        | 0.325           |
| Stable View Synthesis [8]        | 0.243          | 0.317          | 0.137         | 0.281        | 0.286           |
| Instant-NGP [6]                  | 0.397          | 0.441          | 0.255         | 0.339        | 0.420           |
| mip-NeRF [1] w/bigger MLP        | 0.372          | 0.407          | 0.205         | 0.357        | 0.401           |
| NeRF++ [9] w/bigger MLPs         | 0.356          | 0.395          | 0.223         | 0.328        | 0.386           |
| mip-NeRF-360 [2]                 | 0.293          | 0.348          | 0.165         | 0.254        | 0.337           |
| Ours                             | 0.285          | 0.323          | 0.152         | 0.236        | 0.320           |

Table 1. We present an expanded version of Table 3 in our main manuscript. We report the detailed scores on each scene separately, on the low-resolution dataset ( $1280 \times 840$ ).

view synthesis. In *European conference on computer vision*, pages 405–421. Springer, 2020.

- [6] Thomas Müller, Alex Evans, Christoph Schied, and Alexander Keller. Instant neural graphics primitives with a multiresolution hash encoding. *ACM Trans. Graph.*, 41(4):102:1–102:15, July 2022.

- [7] Thomas Neff, Pascal Stadlbauer, Mathias Parger, An-

dreas Kurz, Joerg H Mueller, Chakravarty R Alla Chaitanya, Anton Kaplanyan, and Markus Steinberger. Donerf: Towards real-time rendering of compact radiance fields using depth oracle networks. In *Computer Graphics Forum*, volume 40, pages 45–59. Wiley Online Library, 2021.

- [8] Gernot Riegler and Vladlen Koltun. Stable view syn-

| PSNR                |            |                |                |               |              |                 |                |                |               |              |                 |
|---------------------|------------|----------------|----------------|---------------|--------------|-----------------|----------------|----------------|---------------|--------------|-----------------|
| Method              | Iterations | Standard       |                |               |              |                 | Warped         |                |               |              |                 |
|                     |            | <i>bicycle</i> | <i>flowers</i> | <i>garden</i> | <i>stump</i> | <i>treehill</i> | <i>bicycle</i> | <i>flowers</i> | <i>garden</i> | <i>stump</i> | <i>treehill</i> |
| NeRF [5]            | 1x         | 21.30          | 18.89          | 22.92         | 23.02        | 21.50           | -              | -              | -             | -            | -               |
| mip-NeRF [1]        | 1x         | 21.33          | 18.96          | 22.72         | 22.96        | 20.82           | -              | -              | -             | -            | -               |
| mip-NeRF [1] bigger | 1x         | 21.66          | 19.27          | 24.45         | 23.64        | 20.76           | 22.10          | 19.78          | 25.49         | 23.62        | 21.22           |
| mip-NeRF-360 [2]    | 1x         | 23.68          | 20.83          | 25.83         | 26.25        | 21.96           | 24.38          | 21.63          | 27.31         | 26.81        | 22.78           |
| Ours                | 1x         | 23.82          | 20.89          | 25.95         | 26.36        | 22.18           | 24.57          | 21.86          | 27.5          | 26.96        | 23.00           |
| NeRF [5]            | 4x         | 21.49          | 19.02          | 23.19         | 23.19        | 21.09           | -              | -              | -             | -            | -               |
| mip-NeRF [1]        | 4x         | 21.56          | 19.23          | 23.12         | 23.18        | 21.10           | -              | -              | -             | -            | -               |
| mip-NeRF 360 [2]    | 4x         | 24.17          | 20.71          | 26.26         | 26.19        | 22.09           | 24.96          | 21.44          | 27.90         | 26.78        | 23.05           |
| Ours                | 4x         | 24.47          | 20.94          | 26.43         | 26.53        | 22.42           | 25.44          | 21.92          | 28.25         | 27.18        | 23.32           |
| SSIM                |            |                |                |               |              |                 |                |                |               |              |                 |
| Method              | Iterations | Standard       |                |               |              |                 | Warped         |                |               |              |                 |
|                     |            | <i>bicycle</i> | <i>flowers</i> | <i>garden</i> | <i>stump</i> | <i>treehill</i> | <i>bicycle</i> | <i>flowers</i> | <i>garden</i> | <i>stump</i> | <i>treehill</i> |
| NeRF [5]            | 1x         | 0.464          | 0.363          | 0.503         | 0.561        | 0.478           | -              | -              | -             | -            | -               |
| mip-NeRF [1]        | 1x         | 0.491          | 0.386          | 0.509         | 0.530        | 0.504           | -              | -              | -             | -            | -               |
| mip-NeRF [1] bigger | 1x         | 0.534          | 0.431          | 0.678         | 0.634        | 0.549           | 0.568          | 0.471          | 0.733         | 0.656        | 0.597           |
| mip-NeRF-360 [2]    | 1x         | 0.637          | 0.515          | 0.734         | 0.733        | 0.600           | 0.679          | 0.565          | 0.794         | 0.760        | 0.661           |
| Ours                | 1x         | 0.640          | 0.521          | 0.738         | 0.739        | 0.605           | 0.684          | 0.579          | 0.801         | 0.767        | 0.667           |
| NeRF [5]            | 4x         | 0.471          | 0.370          | 0.519         | 0.568        | 0.483           | -              | -              | -             | -            | -               |
| mip-NeRF [1]        | 4x         | 0.503          | 0.401          | 0.541         | 0.587        | 0.518           | -              | -              | -             | -            | -               |
| mip-NeRF 360 [2]    | 4x         | 0.669          | 0.530          | 0.764         | 0.744        | 0.617           | 0.714          | 0.579          | 0.827         | 0.773        | 0.693           |
| Ours                | 4x         | 0.684          | 0.548          | 0.769         | 0.762        | 0.624           | 0.735          | 0.610          | 0.837         | 0.792        | 0.691           |
| LPIPS               |            |                |                |               |              |                 |                |                |               |              |                 |
| Method              | Iterations | Standard       |                |               |              |                 | Warped         |                |               |              |                 |
|                     |            | <i>bicycle</i> | <i>flowers</i> | <i>garden</i> | <i>stump</i> | <i>treehill</i> | <i>bicycle</i> | <i>flowers</i> | <i>garden</i> | <i>stump</i> | <i>treehill</i> |
| NeRF [5]            | 1x         | 0.717          | 0.700          | 0.554         | 0.583        | 0.768           | -              | -              | -             | -            | -               |
| mip-NeRF [1]        | 1x         | 0.562          | 0.567          | 0.513         | 0.574        | 0.548           | -              | -              | -             | -            | -               |
| mip-NeRF [1] bigger | 1x         | 0.493          | 0.506          | 0.324         | 0.434        | 0.475           | 0.480          | 0.494          | 0.301         | 0.429        | 0.459           |
| mip-NeRF-360 [2]    | 1x         | 0.385          | 0.435          | 0.268         | 0.330        | 0.417           | 0.368          | 0.419          | 0.244         | 0.318        | 0.394           |
| Ours                | 1x         | 0.381          | 0.424          | 0.262         | 0.341        | 0.416           | 0.357          | 0.399          | 0.232         | 0.318        | 0.389           |
| NeRF [5]            | 4x         | 0.669          | 0.668          | 0.513         | 0.559        | 0.741           | -              | -              | -             | -            | -               |
| mip-NeRF [1]        | 4x         | 0.547          | 0.551          | 0.473         | 0.511        | 0.530           | -              | -              | -             | -            | -               |
| mip-NeRF 360 [2]    | 4x         | 0.348          | 0.421          | 0.232         | 0.310        | 0.384           | 0.332          | 0.406          | 0.210         | 0.300        | 0.351           |
| Ours                | 4x         | 0.328          | 0.392          | 0.225         | 0.307        | 0.381           | 0.303          | 0.366          | 0.194         | 0.282        | 0.349           |

Table 2. We present an expanded version of Table 1 in our main manuscript. We report the detailed scores on each scene separately, on the high-resolution dataset ( $2560 \times 1680$ ).

thesis. In *Proceedings of the IEEE/CVF Conference on Computer Vision and Pattern Recognition*, pages 12216–12225, 2021.

- [9] Kai Zhang, Gernot Riegler, Noah Snaveley, and Vladlen Koltun. Nerf++: Analyzing and improving neural radiance fields. *arXiv preprint arXiv:2010.07492*, 2020.
